# Supplementary material
Source: Springer Nature journal article supplement (https://www.springermedizin.de/resource/supplementary/12889_2010_2462_MOESM4_ESM.pdf/9485958)
Supplement: MOESM4 [file 9485958]

**Table 4. Prevalence of allergic diseases in children with different ages**

| Age     | Beijing |          |        | Chongqing |          |        | Guangzhou |          |        |
|---------|---------|----------|--------|-----------|----------|--------|-----------|----------|--------|
|         | Asthma  | Rhinitis | Eczema | Asthma    | Rhinitis | Eczema | Asthma    | Rhinitis | Eczema |
| 0-1 y   | 0.55    | 1.78     | 31.05  | 0         | 0        | 42.86  | 0         | 1.24     | 13.58  |
| 1-2 y   | 1.76    | 4.76     | 29.98  | 0         | 15.63    | 6.25   | 3.73      | 4.48     | 13.43  |
| 2-3 y   | 4.47    | 10.68    | 30.93  | 11.26     | 9.91     | 22.97  | 4.07      | 6.67     | 17.78  |
| 3-4 y   | 4.33    | 15.43    | 31.29  | 9.70      | 18.99    | 20.68  | 2.18      | 8.36     | 13.45  |
| 4-5 y   | 5.00    | 18.23    | 23.39  | 12.29     | 16.57    | 17.14  | 3.92      | 9.48     | 10.13  |
| 5-6 y   | 4.86    | 18.15    | 24.15  | 8.30      | 18.96    | 13.67  | 3.32      | 9.54     | 8.71   |
| 6-7 y   | 3.93    | 19.97    | 20.60  | 8.57      | 20.95    | 13.26  | 2.09      | 10.99    | 5.76   |
| 7-8 y   | 3.70    | 19.98    | 22.22  | 9.35      | 21.95    | 13.05  | 2.62      | 9.69     | 7.07   |
| 8-9 y   | 4.46    | 20.89    | 18.85  | 8.14      | 21.61    | 11.67  | 2.88      | 8.39     | 4.08   |
| 9-10 y  | 3.76    | 19.25    | 16.64  | 6.15      | 20.29    | 7.25   | 0.95      | 5.92     | 2.84   |
| 10-11 y | 3.51    | 19.56    | 16.42  | 4.80      | 18.59    | 4.65   | 0.92      | 8.90     | 3.99   |
| 11-12 y | 1.08    | 11.11    | 10.27  | 4.66      | 20.55    | 5.89   | 1.01      | 5.6      | 4.05   |
| 12-13 y | 1.72    | 10.83    | 8.43   | 4.42      | 22.25    | 5.18   | 0.93      | 7.89     | 4.41   |
| 13-14 y | 1.48    | 14.05    | 7.39   | 3.83      | 25.2     | 9.69   | 0.98      | 9.80     | 8.82   |
| Total   | 3.15    | 14.46    | 20.64  | 7.45      | 20.42    | 10.02  | 2.55      | 7.22     | 7.22   |
